# Supplementary material for: Clonally diverse CD38+HLA-DR+CD8+ T cells persist during fatal H7N9 disease
Source: PubMed Central journal article supplement (PMC5827521; doi:10.1038/s41467-018-03243-7), 2018-02-26
Supplement: 41467_2018_3243_MOESM1_ESM.pdf [file 41467_2018_3243_MOESM1_ESM.pdf]

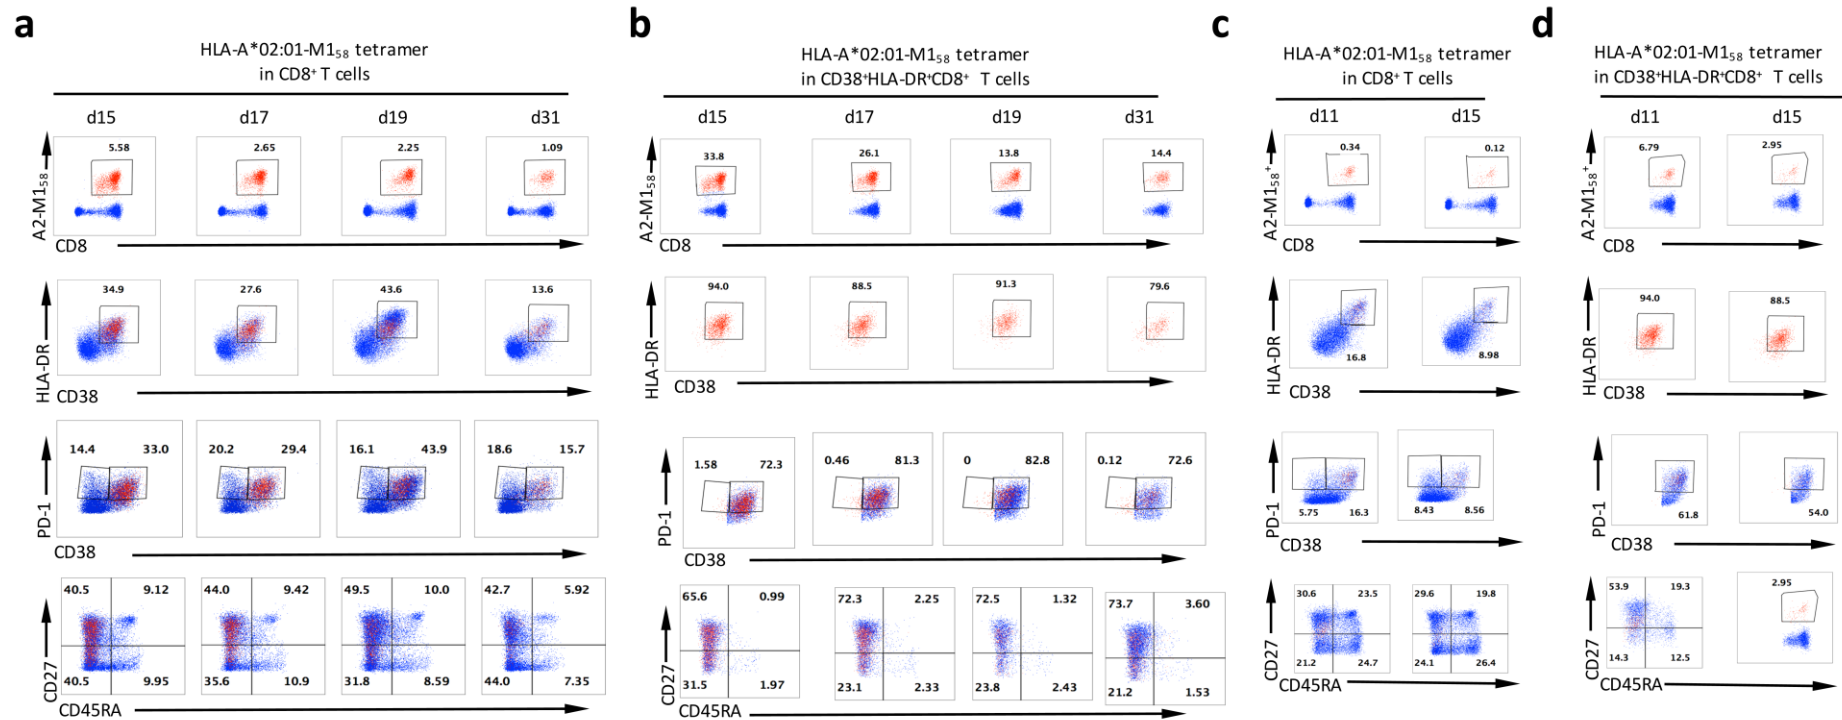

**Supplementary Figure 1. Influenza-specific A2-M1<sub>58</sub>-tetramer<sup>+</sup>CD8<sup>+</sup> T cells are of the CD38<sup>+</sup>HLA-DR<sup>+</sup>PD-1<sup>+</sup> phenotype during severe H7N9 infection.** PBMCs from HLA-A\*02:01-positive patients were stained with the A2-M1<sub>58</sub> tetramer and phenotypic panel described in M&M. Representative FACS plots for A2-M1<sub>58</sub><sup>+</sup>CD8<sup>+</sup> T cells (in red) are shown for **(a, b)** a79 patient and **(c, d)** a9 patient, as gated on **(a)** CD3<sup>+</sup> T cells (in blue) and **(b)** CD8<sup>+</sup> T cells (in blue). Staining for A2-M1<sub>58</sub><sup>+</sup>CD8<sup>+</sup> T cells (in red) and (ii) CD38 and HLA-DR; PD-1 and CD38; and (iv) CD27 and CD45RA is shown. (ii) A2-M1<sub>58</sub><sup>+</sup>CD8<sup>+</sup> T cells of CD38<sup>+</sup>HLA-DR<sup>+</sup> phenotype (red dots) were also (iii, iv) overlaid on total **(a)** CD8<sup>+</sup> T cells (blue dots) or **(b)** CD38<sup>+</sup>HLA-DR<sup>+</sup>CD8<sup>+</sup> T cells (blue dots).

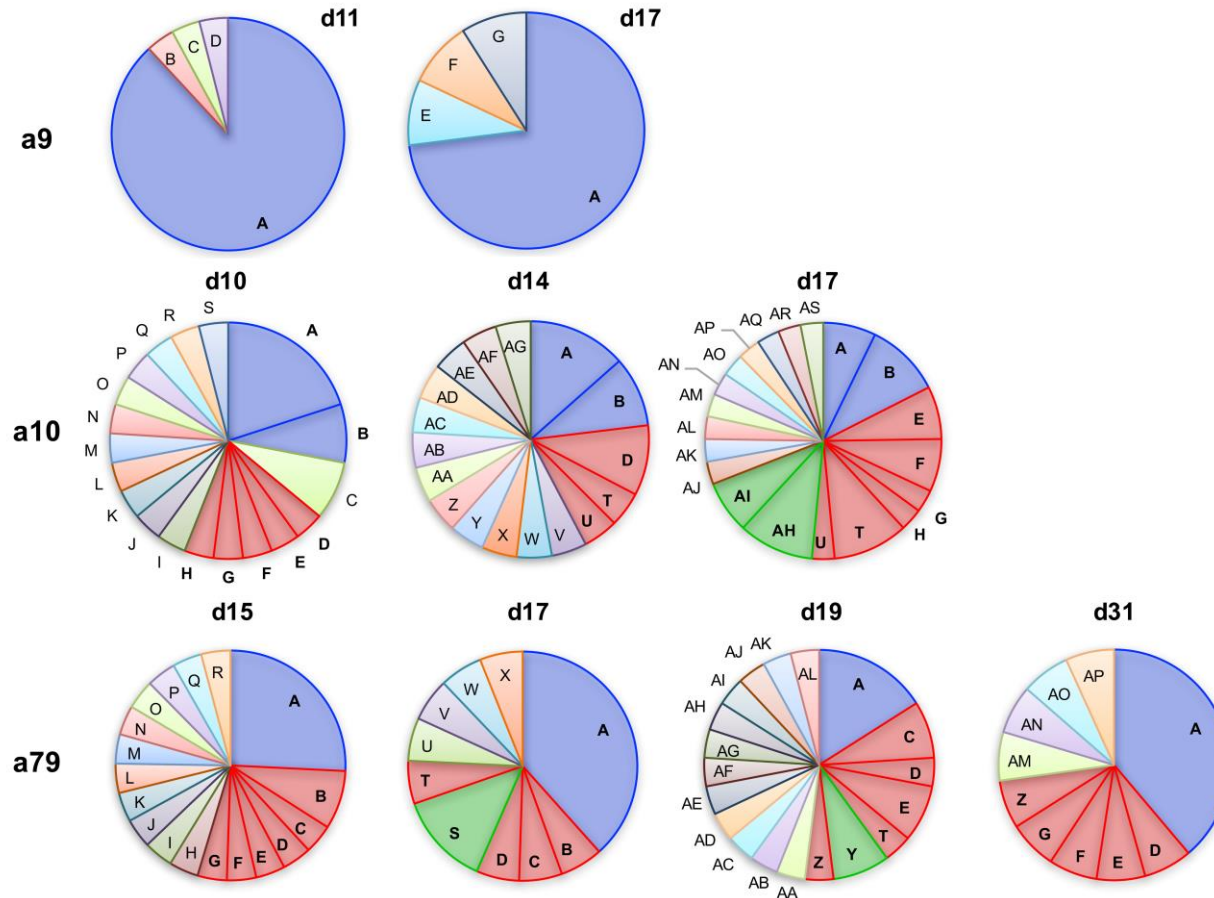

**Supplementary Figure 2. TCR $\alpha\beta$  repertoire diversity and stability within A2-M1<sub>58</sub><sup>+</sup>CD8<sup>+</sup> T cells in HLA-A\*02:01-expressing patients during H7N9 infection.** A2-M1<sub>58</sub><sup>+</sup>CD8<sup>+</sup> T cells from three HLA-A\*02:01-positive H7N9 patients (a9, a10 and a79) were single cell-sorted for TCR $\alpha\beta$  repertoire analysis using a multiplex RT-PCR and sequencing. Populations were gated on viable Dump<sup>-</sup>tetramer<sup>+</sup>CD3<sup>+</sup>CD8<sup>+</sup> events. Frequency, expressed as pie charts, of paired A2-M1<sub>58</sub><sup>+</sup>CD8<sup>+</sup> TCR $\alpha\beta$  clonotypes across different time-points after H7N9 infection are shown. Each TCR $\alpha\beta$  clonotype is depicted in a different letter code, described in Supplementary Table 1 (a9 patient), Supplementary Table 2 (a10 patient) and Supplementary Table 3 (a79 patient).

### TCRαβ repertoire sharing (%)

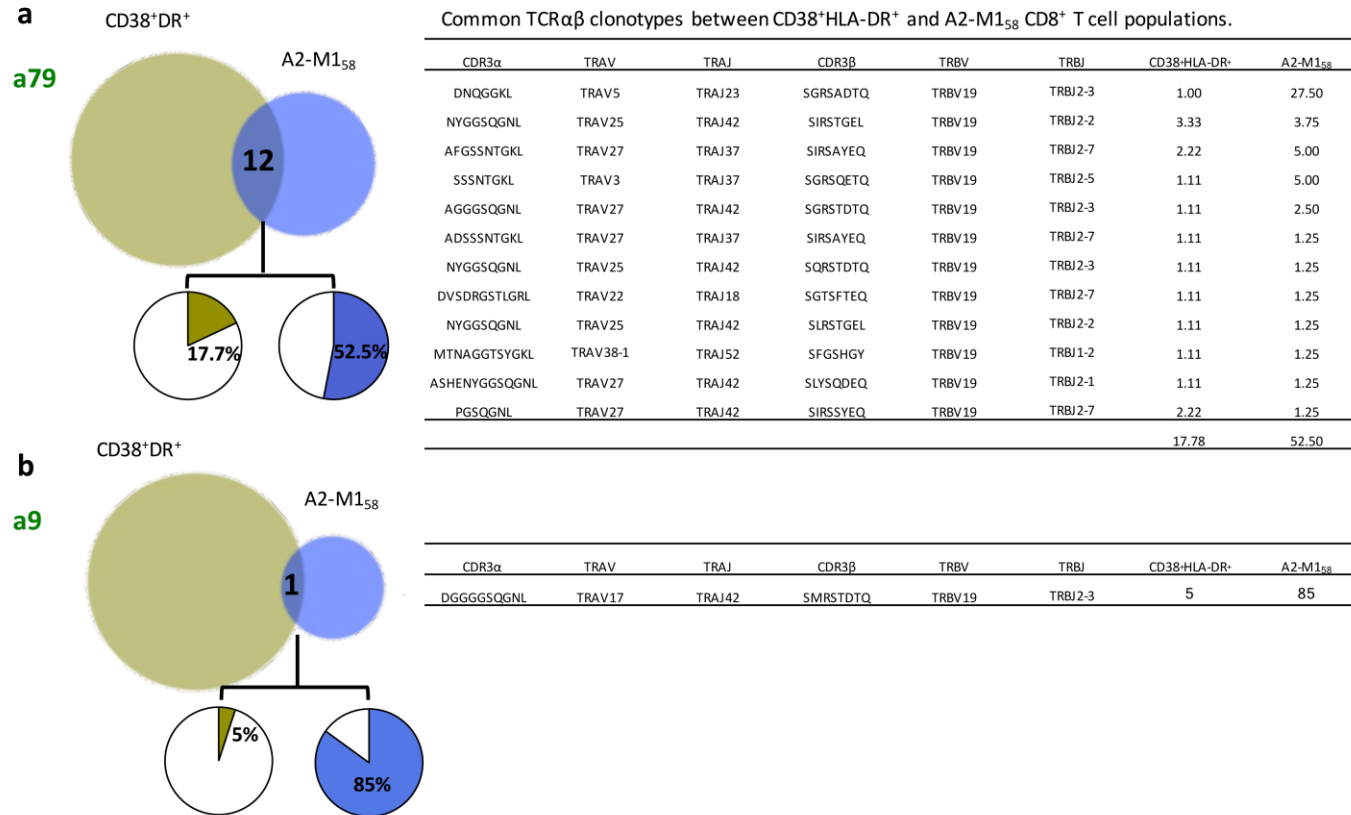

**Supplementary Figure 3. TCRαβ repertoire sharing between M1<sub>58</sub><sup>+</sup>CD8<sup>+</sup> T cells and CD38<sup>+</sup>HLA-DR<sup>+</sup>CD8<sup>+</sup> T cells in patients a79 and a9.** As shown for HLA-A\*02:01-expressing patients **(a)** a79 and **(b)** a9, common TCRαβ clonotypes were detected in both A2-M1<sub>58</sub><sup>+</sup>CD8<sup>+</sup> T cells and CD38<sup>+</sup>HLA-DR<sup>+</sup>CD8<sup>+</sup> TCRαβ repertoires. Proportion of TCRαβ sharing between A2-M1<sub>58</sub><sup>+</sup>CD8<sup>+</sup> T cells and CD38<sup>+</sup>HLA-DR<sup>+</sup>CD8<sup>+</sup> T cells takes into consideration the frequency of each of the common TCRαβ clonotypes. Venn diagrams depicting shared TCRαβ clonotypes between CD38<sup>+</sup>HLA-DR<sup>+</sup> TCRαβ and A2-M1<sub>58</sub> datasets are shown. Pie chart represents % contribution of the shared TCRαβ clonotypes within CD38<sup>+</sup>HLA-DR<sup>+</sup> TCRαβ (olive green) and A2-M1<sub>58</sub> TCRαβ (blue) datasets. Shared TCRαβ clonotypes are listed in the corresponding tables.

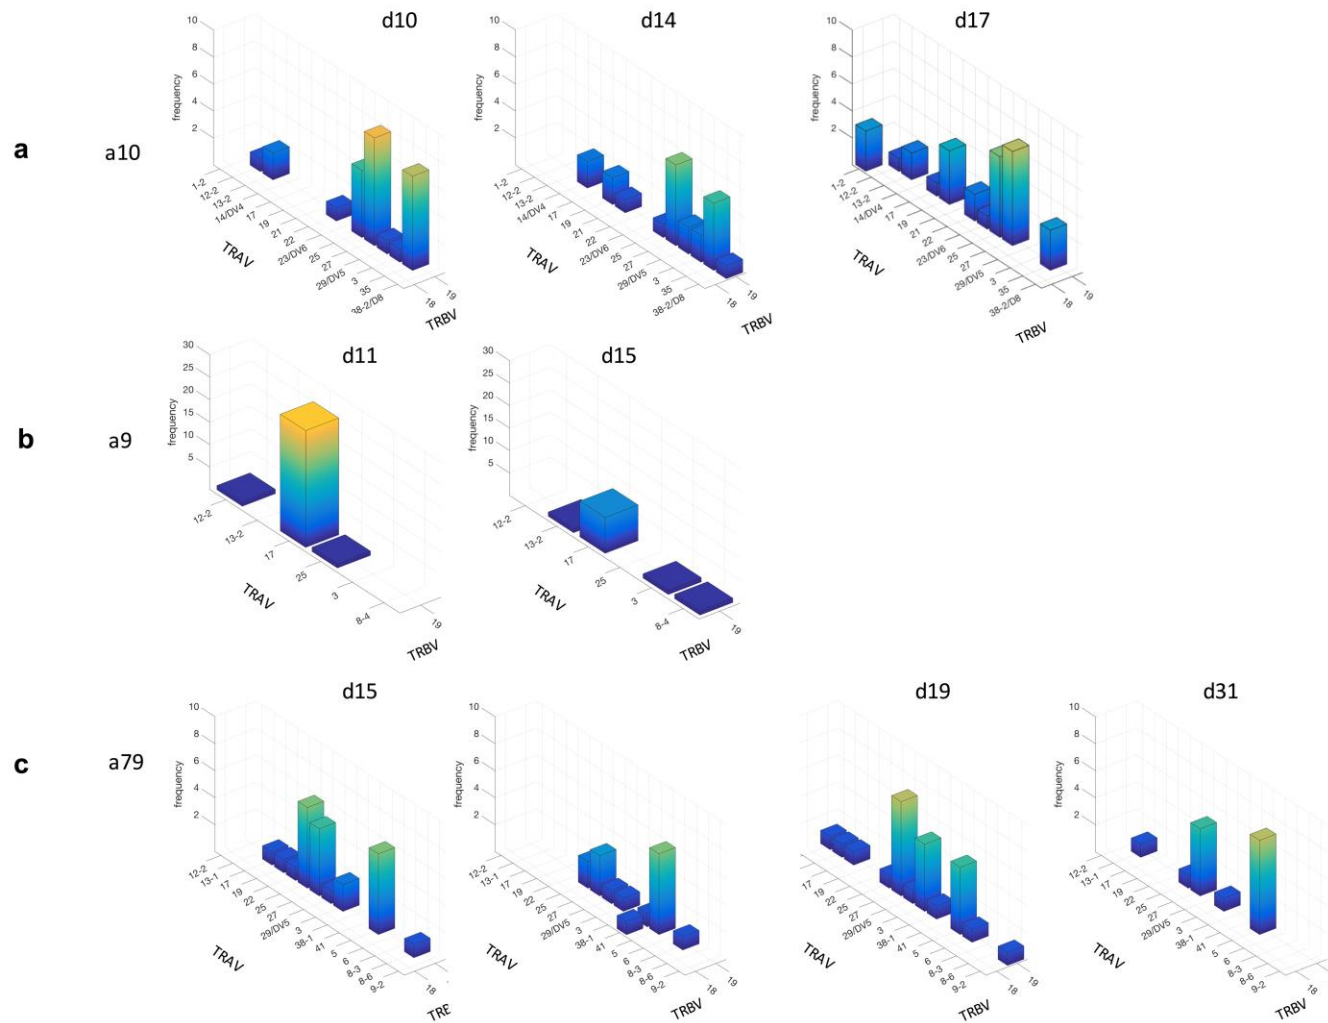

**Supplementary Figure 4. Restricted usage of TCR $\alpha$ -TCR $\beta$  pairings within A2-M1<sub>58</sub><sup>+</sup>CD8<sup>+</sup> T cells in H7N9-infected patients.** The frequency of TCR $\alpha\beta$  clonotypes within TRAV-TRBV paired segments is shown for HLA-A\*02:01-expressing patients: **(a)** 10, **(b)** a9, **(c)** a79. Longitudinal data across different time-points is shown.

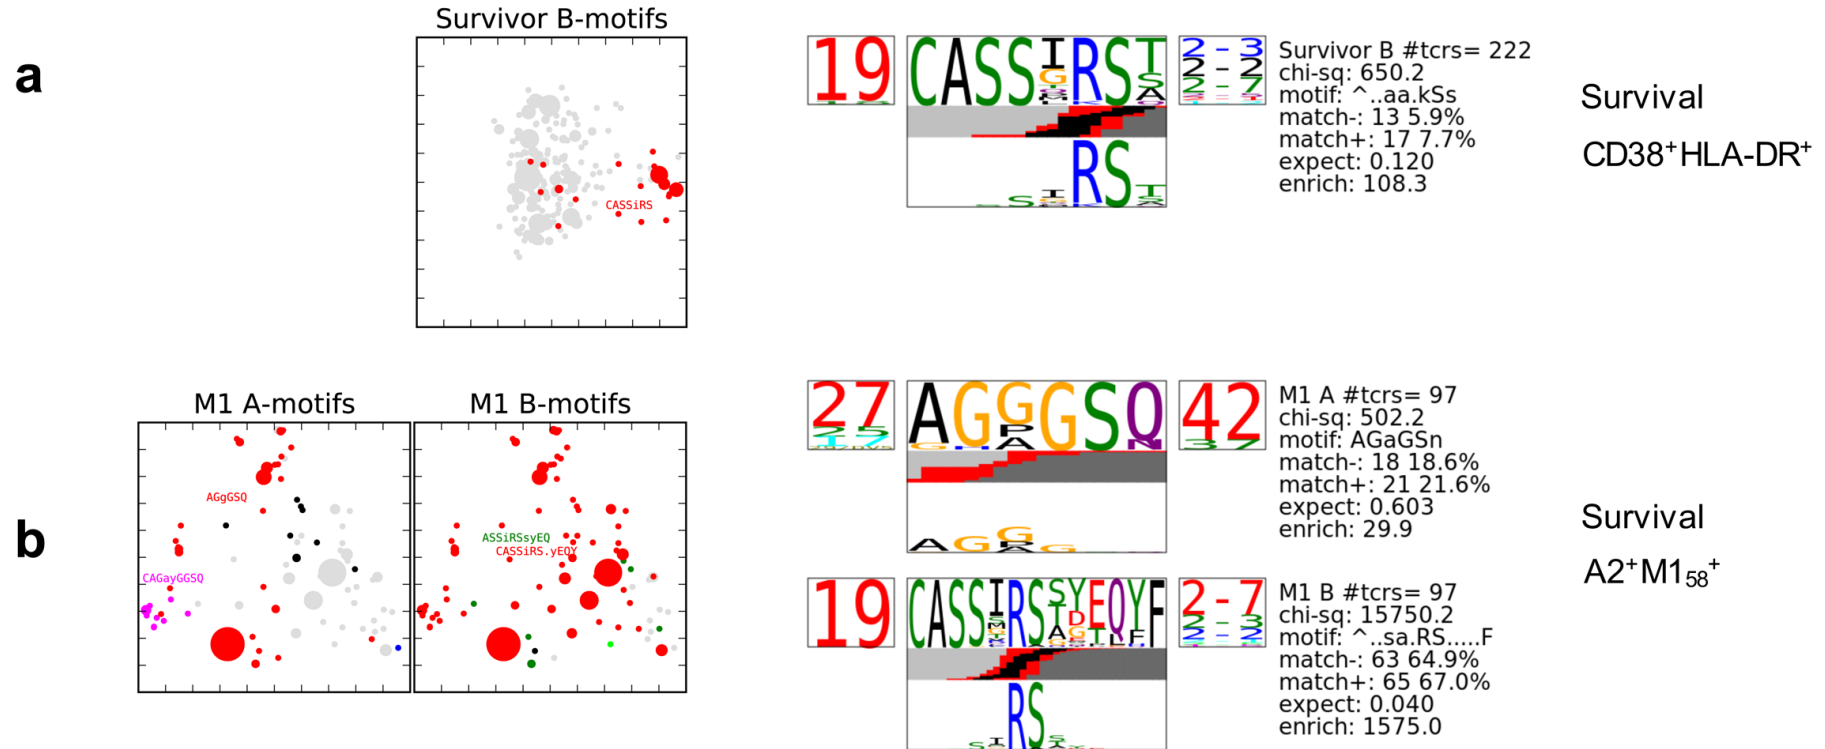

**Supplementary Figure 5. Motif enrichment analysis for survival A2-M1<sub>58</sub><sup>+</sup>CD8<sup>+</sup> and CD38<sup>+</sup>HLA-DR<sup>+</sup>CD8<sup>+</sup> T cells.** Top enriched motifs were identified in the survival group for **(a)** CD38<sup>+</sup>HLA-DR<sup>+</sup>CD8<sup>+</sup> and **(b)** A2-M1<sub>58</sub><sup>+</sup>CD8<sup>+</sup> TCRαβ clonotypes as the TRBV19 CDR3β was predominantly associated with the A2-M1<sub>58</sub> epitope. The top-scoring CDR3α and CDR3β sequence motifs are shown. No motifs were identified amongst the fatal CD38<sup>+</sup>HLA-DR<sup>+</sup>CD8<sup>+</sup> TCRαβ clonotypes.

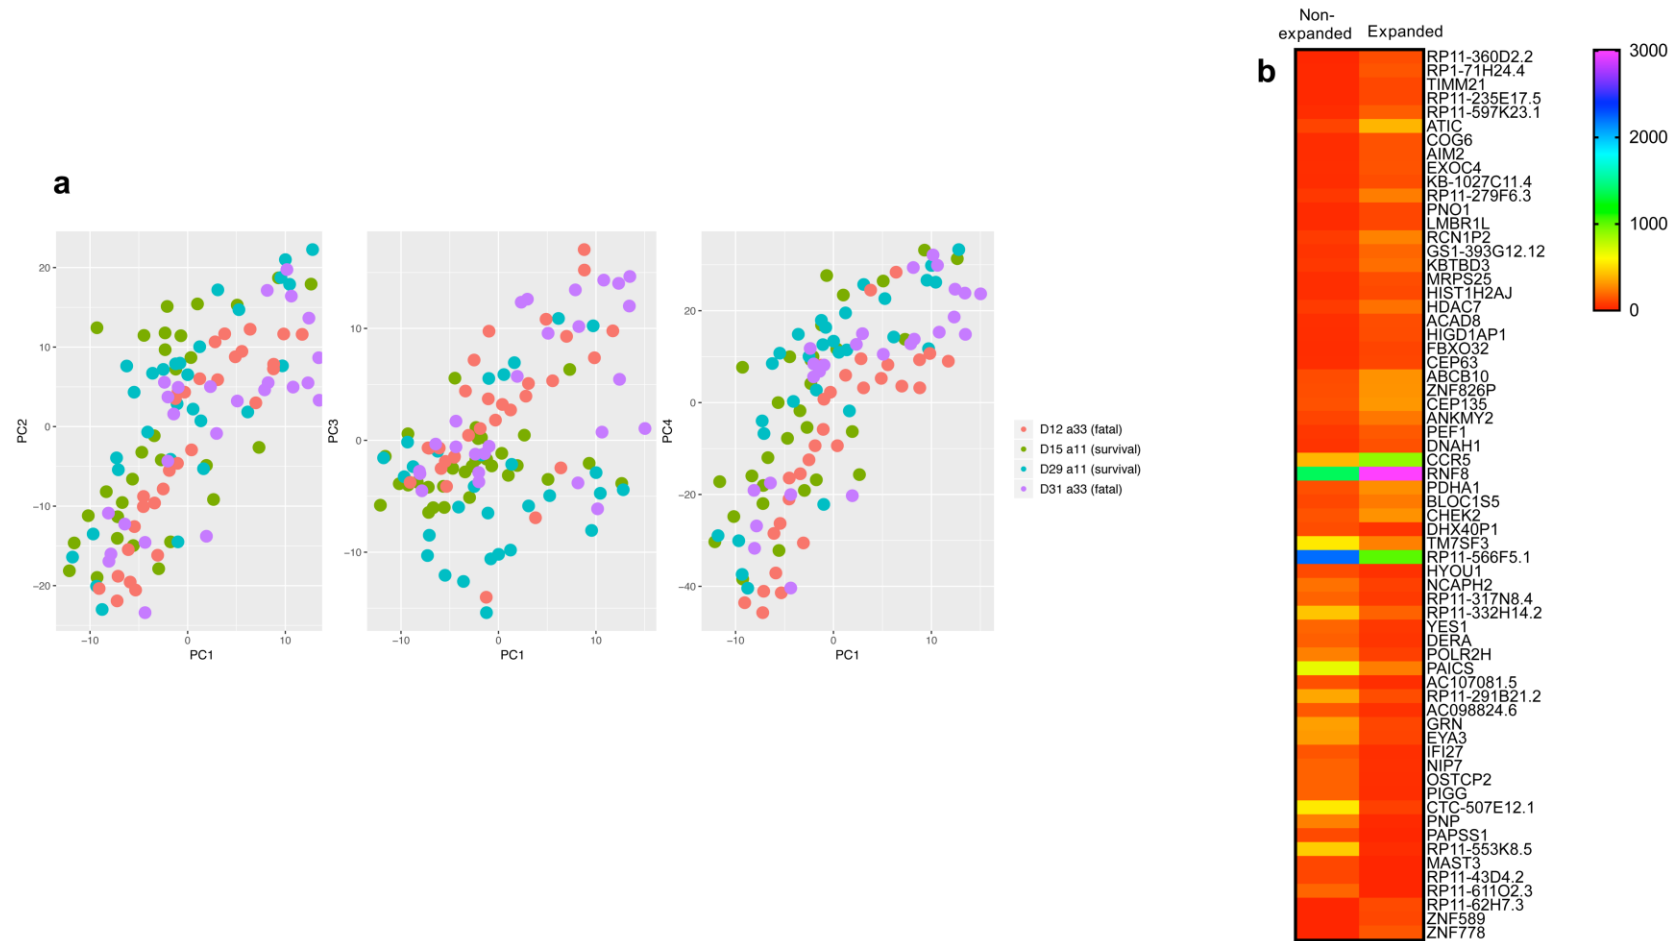

**Supplementary Figure 6. Single-cell RNAseq profiles for CD38<sup>+</sup>HLA-DR<sup>+</sup>CD8<sup>+</sup> T cells.** Single-cell RNAseq (scRNAseq) was performed on CD38<sup>+</sup>HLA-DR<sup>+</sup>CD8<sup>+</sup> T cells from longitudinal samples from two subjects, surviving a11 (d15, d29) and fatal a33 (d12, d31) patients. **(a)** tSNE analysis (PCA) of CD38<sup>+</sup>HLA-DR<sup>+</sup>CD8<sup>+</sup> T cells across the two patients is shown. **(b)** Heatmap of differentially expressed genes between all expanded and non-expanded TCRαβ clonotypes as shown in Fig.6.

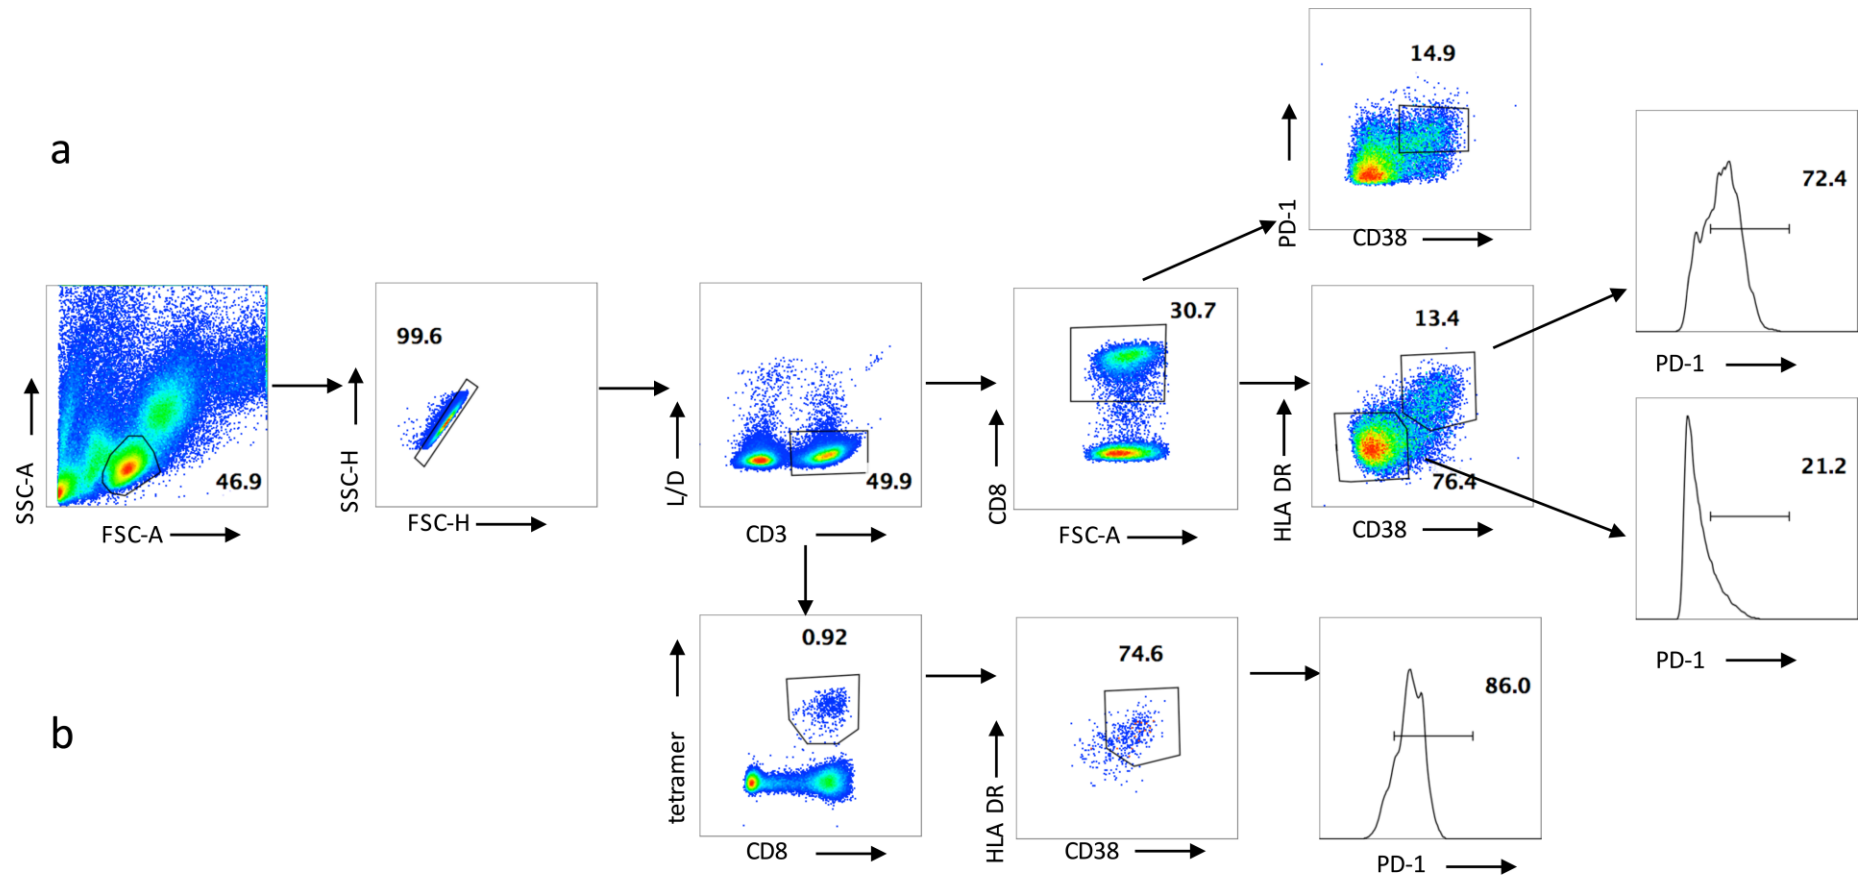

**Supplementary Figure 7. Gating strategy for (a)  $CD38^+HLA-DR^+CD8^+$  T cells and (b) tetramer-positive  $A2/M1_{58}^+CD8^+$  T cells.** PBMCs were stained with Live-dead Aqua 525 and a panel of antibodies: anti-CD3-PB, anti-CD8-FITC, anti-CD27-PE-Cy7, anti-CD45RA-APC-Cy7, anti-HLA-DR-ECD, anti-CD38-PerCPCy5.5, anti-PD-1-APC. Lymphocytes were washed, acquired on an LSR Fortessa with FACS Diva software (Becton Dickinson) and analyzed with FlowJo software. Gating strategy in (a) was used in Figs. 1, 2, 4, 5, 6; while gating strategy in (b) was used for Figs 3, 5.

Supplementary Table 1. Frequencies of CDR3 $\alpha\beta$  clonotypes within A2<sup>+</sup>M1<sub>58</sub><sup>+</sup>CD8<sup>+</sup> T cells in patient a9 at d11 and d15 after hospital admission.

| Clone identifier              | CDR3 $\alpha$ | TRAV     | TRAJ   | CDR3 $\beta$                                       | TRBV   | TRBJ    | D11 | D15 |
|-------------------------------|---------------|----------|--------|----------------------------------------------------|--------|---------|-----|-----|
| A                             | DGGGGSQGNL    | TRAV17   | TRAJ42 | SMRSTDTQ                                           | TRBV19 | TRBJ2-3 | 89% | 73% |
| B                             | QGSQGNL       | TRAV12-2 | TRAJ42 | SE <sub>1</sub> RS <sub>2</sub> SYEQ               | TRBV19 | TRBJ2-7 | 4%  |     |
| C                             | DGGGGSQGNL    | TRAV17   | TRAJ42 | SR <sub>1</sub> RS <sub>2</sub> TD <sub>1</sub> TQ | TRBV19 | TRBJ2-3 | 4%  |     |
| D                             | NYGGSQGNL     | TRAV25   | TRAJ42 | SMR <sub>1</sub> ST <sub>2</sub> GEL               | TRBV19 | TRBJ2-2 | 4%  |     |
| E                             | LMDSNYQL      | TRAV13-2 | TRAJ33 | GV <sub>1</sub> RS <sub>2</sub> GEVEQ              | TRBV19 | TRBJ2-1 |     | 9%  |
| F                             | GGDGSQGNL     | TRAV3    | TRAJ42 | SI <sub>1</sub> RS <sub>2</sub> SYEQ               | TRBV19 | TRBJ2-7 |     | 9%  |
| G                             | SDGENARL      | TRAV8-4  | TRAJ31 | SI <sub>1</sub> RS <sub>2</sub> SYEQ               | TRBV19 | TRBJ2-7 |     | 9%  |
| # of CDR3 $\alpha\beta$ pairs |               |          |        |                                                    |        |         | 28  | 11  |

\* $\alpha\beta$  CDR3 clonotypes found across all the time-points (depicted also in blue). RS motif is shown in pink.

Supplementary Table 2. Frequencies of CDR3 $\alpha\beta$  clonotypes within A2<sup>+</sup>M1<sub>58</sub><sup>+</sup>CD8<sup>+</sup> T cells in patient a10 at d10, d14 and d17 after hospital admission.

| Clone identifier | CDR3 $\alpha$     | TRAV        | TRAJ   | CDR3 $\beta$           | TRBV   | TRBJ    | D10 | D14 | D17 |
|------------------|-------------------|-------------|--------|------------------------|--------|---------|-----|-----|-----|
| A                | PSEPGDSNYQL       | TRAV35      | TRAJ33 | SGLSNQPQ               | TRBV19 | TRBJ1-5 | 20% | 14% | 7%  |
| B                | ADGSGNTGKL        | TRAV27      | TRAJ37 | SIRSA <del>A</del> YEQ | TRBV19 | TRBJ2-7 | 8%  | 10% | 10% |
| C                | QRGDGGSQGNL       | TRAV35      | TRAJ42 | SIVSNQPQ               | TRBV19 | TRBJ1-5 | 8%  |     |     |
| D                | IPVRNGRMNYGGSQGNL | TRAV29/DV5  | TRAJ42 | SSRS <del>G</del> IEQ  | TRBV19 | TRBJ2-7 | 4%  | 10% |     |
| E                | TPSNTGKL          | TRAV22      | TRAJ37 | SIRSA <del>A</del> YEQ | TRBV19 | TRBJ2-7 | 4%  |     | 7%  |
| F                | NYGGSQGNL         | TRAV25      | TRAJ42 | SIRSTGEL               | TRBV19 | TRBJ2-2 | 4%  |     | 7%  |
| G                | NSGGGSQGNL        | TRAV13-2    | TRAJ42 | SFRATDTQ               | TRBV19 | TRBJ2-3 | 4%  |     | 3%  |
| H                | PGSNTGKL          | TRAV27      | TRAJ37 | SIRSSYEQ               | TRBV19 | TRBJ2-7 | 4%  |     | 3%  |
| I                | IRSTL             | TRAV13-2    | TRAJ11 | SIRSA <del>A</del> YEQ | TRBV19 | TRBJ2-7 | 4%  |     |     |
| J                | ADGSSNTGKL        | TRAV27      | TRAJ37 | SIRSA <del>A</del> YEQ | TRBV19 | TRBJ2-7 | 4%  |     |     |
| K                | AGSQGNL           | TRAV27      | TRAJ42 | SIRSSYEQ               | TRBV19 | TRBJ2-7 | 4%  |     |     |
| L                | ASGIHNTDKL        | TRAV27      | TRAJ34 | SMRS <del>A</del> YEQ  | TRBV19 | TRBJ2-7 | 4%  |     |     |
| M                | GGSSNTGKL         | TRAV27      | TRAJ37 | SSRS <del>G</del> WEQ  | TRBV19 | TRBJ2-7 | 4%  |     |     |
| N                | PGSNTGKF          | TRAV27      | TRAJ37 | SIRSSYEQ               | TRBV19 | TRBJ2-7 | 4%  |     |     |
| O                | TYGGSQGNL         | TRAV25      | TRAJ42 | SIRSTGEL               | TRBV19 | TRBJ2-2 | 4%  |     |     |
| P                | AHGGSQGNL         | TRAV25      | TRAJ42 | SGRSTDTQ               | TRBV19 | TRBJ2-3 | 4%  |     |     |
| Q                | RDLKANAGKS        | TRAV3       | TRAJ27 | SDSITEA                | TRBV19 | TRBJ1-1 | 4%  |     |     |
| R                | WGSQGNL           | TRAV25      | TRAJ42 | SSRS <del>G</del> NEQ  | TRBV19 | TRBJ2-1 | 4%  |     |     |
| S                | QGSQGNL           | TRAV12-2    | TRAJ42 | SSRS <del>S</del> YEQ  | TRBV19 | TRBJ2-7 | 4%  |     |     |
| T                | SEVQLMDSNYQL      | TRAV19      | TRAJ33 | SIYSGQPQ               | TRBV19 | TRBJ1-5 |     | 5%  | 10% |
| U                | GGSQGNL           | TRAV27      | TRAJ42 | SIRSSYEQ               | TRBV19 | TRBJ2-7 |     | 5%  | 3%  |
| V                | AVGSSNTGKL        | TRAV27      | TRAJ37 | SIRSA <del>A</del> YEQ | TRBV19 | TRBJ2-7 |     | 5%  |     |
| W                | DDQGGKL           | TRAV27      | TRAJ23 | SIRSSYEQ               | TRBV19 | TRBJ2-7 |     | 5%  |     |
| X                | QADRGSTLGRL       | TRAV27      | TRAJ18 | SMYSINIQ               | TRBV19 | TRBJ2-4 |     | 5%  |     |
| Y                | RGGNAGKS          | TRAV35      | TRAJ27 | SGYSINEQ               | TRBV19 | TRBJ2-1 |     | 5%  |     |
| Z                | SEDGNDYKL         | TRAV19      | TRAJ20 | GFPYEQ                 | TRBV19 | TRBJ2-7 |     | 5%  |     |
| AA               | RDFEDSGNTPL       | TRAV14/DV4  | TRAJ29 | STYSRDTQ               | TRBV19 | TRBJ2-3 |     | 5%  |     |
| AB               | REGMEYGNKL        | TRAV14/DV4  | TRAJ47 | SIFSTPNQPQ             | TRBV19 | TRBJ1-5 |     | 5%  |     |
| AC               | NPGNTGKL          | TRAV21      | TRAJ37 | SSYGSYEQ               | TRBV19 | TRBJ2-7 |     | 5%  |     |
| AD               | RDGTGANNL         | TRAV3       | TRAJ36 | GGISTDTQ               | TRBV19 | TRBJ2-3 |     | 5%  |     |
| AE               | RDLETNAGKS        | TRAV3       | TRAJ27 | STTSGTEQ               | TRBV19 | TRBJ2-1 |     | 5%  |     |
| AF               | SYGGSQGNL         | TRAV25      | TRAJ42 | SIRSTDTQ               | TRBV19 | TRBJ2-3 |     | 5%  |     |
| AG               | SLSAGGTSYGKL      | TRAV38-2/D8 | TRAJ52 | SIGVYGY                | TRBV19 | TRBJ1-2 |     | 5%  |     |
| AH               | VEAEYGNKL         | TRAV1-2     | TRAJ47 | SLTGTVYEQ              | TRBV18 | TRBJ2-7 |     |     | 10% |
| AI               | AGNTGKL           | TRAV27      | TRAJ37 | SVRSSYEQ               | TRBV19 | TRBJ2-7 |     |     | 7%  |
| AJ               | NPSNTGKL          | TRAV23/DV6  | TRAJ37 | SIRAA <del>A</del> YEQ | TRBV19 | TRBJ2-7 |     |     | 3%  |
| AK               | NNGGGSQGNL        | TRAV13-2    | TRAJ42 | SGRAGGEL               | TRBV19 | TRBJ2-2 |     |     | 3%  |

|                        |              |          |        |                                       |           |           |           |
|------------------------|--------------|----------|--------|---------------------------------------|-----------|-----------|-----------|
| <b>AL</b>              | GGSQGNL      | TRAV12-2 | TRAJ42 | SIR <sup>RS</sup> SYEQ                | TRBV19    | TRBJ2-7   | 3%        |
| <b>AM</b>              | NYGGSQGNL    | TRAV25   | TRAJ42 | SR <sup>RS</sup> TD <sup>T</sup> DTQ  | TRBV19    | TRBJ2-3   | 3%        |
| <b>AN</b>              | NYGGSQGNL    | TRAV35   | TRAJ42 | SMRGSDTQ                              | TRBV19    | TRBJ2-3   | 3%        |
| <b>AO</b>              | PGSNTGKL     | TRAV25   | TRAJ37 | SIR <sup>RS</sup> SQPQ                | TRBV19    | TRBJ1-5   | 3%        |
| <b>AP</b>              | SYGGSQGNL    | TRAV25   | TRAJ42 | SIR <sup>RS</sup> HDEQ                | TRBV19    | TRBJ2-1   | 3%        |
| <b>AQ</b>              | SYGGSQGNL    | TRAV25   | TRAJ42 | SIR <sup>RS</sup> TD <sup>T</sup> DTQ | TRBV19    | TRBJ2-3   | 3%        |
| <b>AR</b>              | VEGSYIP      | TRAV19   | TRAJ6  | GPHGGGNNEQ                            | TRBV19    | TRBJ2-1   | 3%        |
| <b>AS</b>              | DAMPPGGNTGKL | TRAV17   | TRAJ37 | SFYSNQPQ                              | TRBV19    | TRBJ1-5   | 3%        |
| <b>of CDR3αβ pairs</b> |              |          |        |                                       | <b>25</b> | <b>21</b> | <b>30</b> |

\*αβ CDR3 clonotypes found across all the time-points (depicted also in blue); #\*αβ CDR3 clonotypes found at >1 time-point (depicted in red). RS motif is shown in pink. and αβ CDR3 clonotypes found at >1 in one time-point (depicted in green).

Underlining is the difference in residues to the main referenced public motifs in that colour block

Supplementary Table 3. Frequencies of CDR3 $\alpha\beta$  clonotypes within A2<sup>+</sup>M1<sub>58</sub><sup>+</sup>CD8<sup>+</sup> T cells in patient a79 at d15, d17, d19 and d31 after hospital admission.

| Clone identifier | CDR3 $\alpha$ | TRAV       | TRAJ   | CDR3 $\beta$ | TRBV   | TRBJ    | D15 | D17 | D19 | D31 |
|------------------|---------------|------------|--------|--------------|--------|---------|-----|-----|-----|-----|
| A                | DNQGGKL       | TRAV5      | TRAJ23 | SGRSADTQ     | TRBV19 | TRBJ2-3 | 25% | 38% | 16% | 40% |
| B                | NYGGSQGNL     | TRAV25     | TRAJ42 | SIRSTGEL     | TRBV19 | TRBJ2-2 | 8%  | 6%  |     |     |
| C                | SGIGGSQGNL    | TRAV3      | TRAJ42 | STRSSYEQ     | TRBV19 | TRBJ2-7 | 4%  | 6%  | 8%  |     |
| D                | AFGSSNTGKL    | TRAV27     | TRAJ37 | SIRSAYEQ     | TRBV19 | TRBJ2-7 | 4%  | 6%  | 4%  | 7%  |
| E                | SSSNTGKL      | TRAV3      | TRAJ37 | SGRSQETQ     | TRBV19 | TRBJ2-5 | 4%  |     | 8%  | 7%  |
| F                | AGGGSQGNL     | TRAV27     | TRAJ42 | SGRSTDTQ     | TRBV19 | TRBJ2-3 | 4%  |     |     | 7%  |
| G                | AGSQGNL       | TRAV27     | TRAJ42 | SSRSSYEQ     | TRBV19 | TRBJ2-7 | 4%  |     |     | 7%  |
| H                | LYGGSQGNL     | TRAV25     | TRAJ42 | SILSQQPQ     | TRBV19 | TRBJ1-5 | 4%  |     |     |     |
| I                | SALRGMDSNYQL  | TRAV29/DV5 | TRAJ33 | SIFAHSSQPQ   | TRBV19 | TRBJ1-5 | 4%  |     |     |     |
| J                | SSNTGKL       | TRAV8-6    | TRAJ37 | SIRSSYEQ     | TRBV19 | TRBJ2-7 | 4%  |     |     |     |
| K                | ADSSSNTGKL    | TRAV27     | TRAJ37 | SIRSAYEQ     | TRBV19 | TRBJ2-7 | 4%  |     |     |     |
| L                | AGGGSQGNL     | TRAV25     | TRAJ42 | SKRSSDTQ     | TRBV19 | TRBJ2-3 | 4%  |     |     |     |
| M                | AGGGSQGNL     | TRAV27     | TRAJ42 | SMRSSAGEL    | TRBV19 | TRBJ2-2 | 4%  |     |     |     |
| N                | NYGGSQGNL     | TRAV25     | TRAJ42 | SQRSSTDTQ    | TRBV19 | TRBJ2-3 | 4%  |     |     |     |
| O                | TYGGSQGNL     | TRAV25     | TRAJ42 | SIRSTGEL     | TRBV19 | TRBJ2-2 | 4%  |     |     |     |
| P                | SEASAGGTSYGKL | TRAV19     | TRAJ52 | SMAGGPGNEQ   | TRBV19 | TRBJ2-1 | 4%  |     |     |     |
| Q                | DGSSSNTGKL    | TRAV17     | TRAJ37 | SIYSGGYNEQ   | TRBV19 | TRBJ2-1 | 4%  |     |     |     |
| R                | DVSDRGSTLGR   | TRAV22     | TRAJ18 | SGTSFTEQ     | TRBV19 | TRBJ2-7 | 4%  |     |     |     |
| S                | GGSQGNL       | TRAV27     | TRAJ42 | SIRSSYEQ     | TRBV19 | TRBJ2-7 |     | 13% |     |     |
| T                | SAGGGSQGNL    | TRAV29/DV5 | TRAJ42 | SIRASYEQ     | TRBV19 | TRBJ2-7 |     | 6%  | 4%  |     |
| U                | NYGGSQGNL     | TRAV25     | TRAJ42 | SLRSTGEL     | TRBV19 | TRBJ2-2 |     | 6%  |     |     |
| V                | LLQGAQKL      | TRAV41     | TRAJ54 | SFGMHGY      | TRBV19 | TRBJ1-2 |     | 6%  |     |     |
| W                | GGSQGNL       | TRAV8-3    | TRAJ42 | SMISINEQ     | TRBV19 | TRBJ2-1 |     | 6%  |     |     |
| X                | SPMEYGNKL     | TRAV41     | TRAJ47 | SPVGIGEA     | TRBV18 | TRBJ1-1 |     | 6%  |     |     |
| Y                | DGGGGSQGNL    | TRAV27     | TRAJ42 | SIRSTGEL     | TRBV19 | TRBJ2-2 |     |     | 8%  |     |
| Z                | QGSQGNL       | TRAV13-1   | TRAJ42 | STRSSETQ     | TRBV19 | TRBJ2-5 |     |     | 4%  | 7%  |
| AA               | MTNAGGTSYGKL  | TRAV38-1   | TRAJ52 | SFGSHGY      | TRBV19 | TRBJ1-2 |     |     | 4%  |     |
| AB               | AGSQGNL       | TRAV27     | TRAJ42 | SIRSSYEQ     | TRBV19 | TRBJ2-7 |     |     | 4%  |     |
| AC               | ASGSSNTGKL    | TRAV27     | TRAJ37 | SIRSAYEQ     | TRBV19 | TRBJ2-7 |     |     | 4%  |     |
| AD               | ASHENYGGSQGNL | TRAV27     | TRAJ42 | SLYSQDEQ     | TRBV19 | TRBJ2-1 |     |     | 4%  |     |
| AE               | MEYGNKL       | TRAV3      | TRAJ47 | SIRSTDTQ     | TRBV19 | TRBJ2-3 |     |     | 4%  |     |
| AF               | PGSQGNL       | TRAV27     | TRAJ42 | SIRSSYEQ     | TRBV19 | TRBJ2-7 |     |     | 4%  |     |
| AG               | DMGGGSQGNL    | TRAV6      | TRAJ42 | SIRAADTQ     | TRBV19 | TRBJ2-3 |     |     | 4%  |     |
| AH               | QGSQGNL       | TRAV9-2    | TRAJ42 | SSRSSGVEQ    | TRBV19 | TRBJ2-7 |     |     | 4%  |     |
| AI               | NYGGSQGNL     | TRAV25     | TRAJ42 | SMRSTGEL     | TRBV19 | TRBJ2-2 |     |     | 4%  |     |
| AJ               | ETGNQF        | TRAV5      | TRAJ49 | SGRSSAGEL    | TRBV19 | TRBJ2-2 |     |     | 4%  |     |

|                   |            |          |        |                        |        |         |    |    |
|-------------------|------------|----------|--------|------------------------|--------|---------|----|----|
| AK                | DAGGGSQGNL | TRAV17   | TRAJ42 | MGLAGLNEQ              | TRBV19 | TRBJ2-1 | 4% |    |
| AL                | NRGGGSQGNL | TRAV12-2 | TRAJ42 | SIR <sup>RS</sup> SYEQ | TRBV19 | TRBJ2-7 | 4% |    |
| AM                | SIPAGANSKL | TRAV5    | TRAJ56 | SRYHTDTQ               | TRBV19 | TRBJ2-3 |    | 7% |
| AN                | AGGGSQGNL  | TRAV27   | TRAJ42 | SIR <sup>RS</sup> TDQ  | TRBV19 | TRBJ2-3 |    | 7% |
| AO                | AGGGSQGNL  | TRAV27   | TRAJ42 | STR <sup>RS</sup> TDQ  | TRBV19 | TRBJ2-3 |    | 7% |
| AP                | SYGGSQGNL  | TRAV25   | TRAJ42 | STR <sup>RS</sup> TSPG | TRBV19 | TRBJ1-5 |    | 7% |
| # of CDR3ab pairs |            |          |        |                        | 24     | 16      | 25 | 15 |

\* $\alpha\beta$  CDR3 clonotypes found across all the time-points (depicted also in blue); #\* $\alpha\beta$  CDR3 clonotypes found at >1 time-point (depicted in red). <sup>RS</sup> motif is shown in pink. and  $\alpha\beta$  CDR3 clonotypes found at >1 in one time-point (depicted in green).

Supplementary Table 4. Summary of all the samples used in TCR analysis

| Group    | Individual | Sample   | Timepoint | Epitope                           | HLA-A | HLA-A | HLA-B | HLA-B | Discharged after days of onset or death |
|----------|------------|----------|-----------|-----------------------------------|-------|-------|-------|-------|-----------------------------------------|
| survival | A10        | A10 D10  | Day10     | M1 <sub>58</sub> <sup>+</sup>     | 0201  | 3201  | 702   | 4001  | 18                                      |
|          |            | A10 D14  | Day14     |                                   |       |       |       |       |                                         |
|          |            | A10 D17  | Day17     |                                   |       |       |       |       |                                         |
|          | A9         | a9 D11   | Day11     |                                   | 0201  | 0207  | 1511  | 4002  | 23                                      |
|          |            | a9 D15   | Day15     |                                   |       |       |       |       |                                         |
|          |            | a79 D15  | Day15     |                                   | 0201  | 1101  | 1501  | 0603  | 31                                      |
|          | A79        | a79 D17  | Day 17    |                                   |       |       |       |       |                                         |
|          |            | a79 D19  | Day19     |                                   |       |       |       |       |                                         |
|          |            | a79 D31  | Day31     |                                   |       |       |       |       |                                         |
|          | A9         | a9 D11   | Day11     | DR <sup>+</sup> CD38 <sup>+</sup> | 0201  | 0207  | 1511  | 4002  | 23                                      |
|          |            | a9 D15   | Day15     |                                   |       |       |       |       |                                         |
|          |            | A20 D5   | Day5      |                                   | 1102  | 2601  | 1518  | 1518  | 23                                      |
|          | A20        | A20 D17  | Day17     |                                   |       |       |       |       |                                         |
|          |            | A78 D11  | Day11     |                                   | 0207  | 2402  | 4601  | 4801  | 22                                      |
|          |            | A78 D17  | Day17     |                                   |       |       |       |       |                                         |
|          | A79        | a79 D15  | Day15     |                                   | 0201  | 1101  | 1501  | 5603  | 31                                      |
|          |            | a79 D17  | Day 17    |                                   |       |       |       |       |                                         |
|          |            | a79 D31  | Day31     |                                   |       |       |       |       |                                         |
|          | A11        | A11 d9   | Day9      |                                   | 3001  | 3101  | 1302  | 4006  | 33                                      |
|          |            | A11 D13  | Day13     |                                   |       |       |       |       |                                         |
|          |            | A11 D18  | Day18     |                                   |       |       |       |       |                                         |
| fatal    | A131       | a131 D22 | Day22     | DR <sup>+</sup> CD38 <sup>+</sup> | 0301  | 1101  | 1302  | 3802  | death                                   |
|          |            | a131 D27 | Day27     |                                   |       |       |       |       |                                         |
|          |            | a131 D32 | Day32     |                                   |       |       |       |       |                                         |

|     |         |       |      |      |      |      |       |
|-----|---------|-------|------|------|------|------|-------|
|     | a33 D8  | Day8  | 0206 | 3101 | 4006 | 5601 | death |
| A33 | a33 D19 | Day19 |      |      |      |      |       |
|     | a33 D33 | Day33 |      |      |      |      |       |

---

Supplementary Table 5. Frequencies of CDR3 $\alpha\beta$  clonotypes within HLA-DR+CD38+ CD8+ T cells in patients a78, a20, a11, a9, a79, a131 and a33 at different time points after hospital admission.

| Donor a78<br>Clone<br>identifier | CDR3 $\alpha$ | TRAV       | TRAJ   | CDR3 $\beta$   | TRBV     | TRBJ    | D11 | D17 |
|----------------------------------|---------------|------------|--------|----------------|----------|---------|-----|-----|
| A                                | NAQAAGNKL     | TRAV8-1    | TRAJ17 | SPHWTNTDTQ     | TRBV11-2 | TRBJ2-3 | 10% |     |
| B                                | PWSSGTYKY     | TRAV35     | TRAJ40 | SSPSGTSGSYEQ   | TRBV7-8  | TRBJ2-7 | 5%  | 4%  |
| C                                | RRRGLGGGGFKT  | TRAV21     | TRAJ9  | SKTGGQAGEL     | TRBV9    | TRBJ2-2 | 5%  | 4%  |
| D                                | KESGSARQL     | TRAV13-1   | TRAJ22 | SVRGGGSPSDTQ   | TRBV7-9  | TRBJ2-3 | 5%  |     |
| E                                | LIQGAQKL      | TRAV29/DV5 | TRAJ54 | SITTPLTGEL     | TRBV30   | TRBJ2-2 | 5%  |     |
| F                                | SYFGNEKL      | TRAV13-1   | TRAJ48 | SGARGGNEQ      | TRBV7-9  | TRBJ2-1 | 5%  |     |
| G                                | DTGNQF        | TRAV39     | TRAJ49 | TVFFGTGGAYGY   | TRBV6-1  | TRBJ1-2 | 5%  |     |
| H                                | GAGGFKT       | TRAV12-2   | TRAJ9  | SDLSTDQ        | TRBV10-1 | TRBJ2-3 | 5%  |     |
| I                                | SDLGNTGGFKT   | TRAV19     | TRAJ9  | SYSKGGPNTGEL   | TRBV6-5  | TRBJ2-2 | 5%  |     |
| J                                | DNTDKL        | TRAV6      | TRAJ34 | KGTGGYNEQ      | TRBV14   | TRBJ2-1 | 5%  |     |
| K                                | ATDSWGKF      | TRAV8-6    | TRAJ24 | SWDRDSDPL      | TRBV25-1 | TRBJ1-6 | 5%  |     |
| L                                | GAFAGGKGL     | TRAV8-3    | TRAJ23 | SQQQYEGTVYGY   | TRBV3-1  | TRBJ1-2 | 5%  |     |
| M                                | IGASGTYKY     | TRAV12-1   | TRAJ40 | SLLAGGEETQ     | TRBV28   | TRBJ2-5 | 5%  |     |
| N                                | RDAGNNHIQ     | TRAV3      | TRAJ38 | SVWGGEGADTQ    | TRBV9    | TRBJ2-3 | 5%  |     |
| O                                | RGRSGGYQKV    | TRAV19     | TRAJ13 | SLRGRAEETQ     | TRBV27   | TRBJ2-5 | 5%  |     |
| P                                | RVAQSAAGNKL   | TRAV1-2    | TRAJ17 | SQESGTSGSTDQ   | TRBV4-1  | TRBJ2-3 | 5%  |     |
| Q                                | TEGGSEKL      | TRAV21     | TRAJ57 | GRSLEL         | TRBV7-9  | TRBJ1-4 | 5%  |     |
| R                                | DVRGGYNKL     | TRAV4      | TRAJ4  | SLKGTGKADEQ    | TRBV5-4  | TRBJ2-1 | 5%  |     |
| S                                | VPGARL        | TRAV17     | TRAJ31 | SVTGNTQA       | TRBV9    | TRBJ1-1 | 5%  |     |
| T                                | SDQRYQL       | TRAV8-2    | TRAJ33 | SLYAENTGEL     | TRBV11-2 | TRBJ2-2 | 5%  |     |
| U                                | ETSGSRL       | TRAV39     | TRAJ58 | AAPGARVRYEQ    | TRBV29-1 | TRBJ2-7 |     | 11% |
| V                                | NNTGFQKL      | TRAV13-2   | TRAJ8  | SLEASGGVTDQ    | TRBV5-6  | TRBJ2-3 |     | 4%  |
| W                                | LEGSTLGR      | TRAV1-2    | TRAJ18 | SVDSTTYNEQ     | TRBV9    | TRBJ2-1 |     | 4%  |
| X                                | SEEAAGNKL     | TRAV19     | TRAJ17 | SIFITNGQPNTQA  | TRBV19   | TRBJ1-1 |     | 4%  |
| Y                                | SGVSGGGADGL   | TRAV14/DV4 | TRAJ45 | SLGVDTTNEKL    | TRBV28   | TRBJ1-4 |     | 4%  |
| Z                                | VRRGGSNYKL    | TRAV41     | TRAJ53 | SRGAGFYNEQ     | TRBV7-2  | TRBJ2-1 |     | 4%  |
| AA                               | NQGGKL        | TRAV21     | TRAJ23 | RTPTGANLKL     | TRBV6-3  | TRBJ1-4 |     | 4%  |
| AB                               | EAIQGAQKL     | TRAV36/DV7 | TRAJ54 | SLGQGYRSL      | TRBV5-8  | TRBJ1-6 |     | 4%  |
| AC                               | EGGTSYGKL     | TRAV20     | TRAJ52 | SQVTSSTDQ      | TRBV4-1  | TRBJ2-3 |     | 4%  |
| AD                               | KRGRAGSYQL    | TRAV21     | TRAJ28 | SVRLAGGPRQAYEQ | TRBV30   | TRBJ2-7 |     | 4%  |
| AE                               | NNMMGRGSTLGR  | TRAV12-2   | TRAJ18 | SQVGSNQPQ      | TRBV3-1  | TRBJ1-5 |     | 4%  |
| AF                               | NSGGSNYKL     | TRAV12-2   | TRAJ53 | SNFRGLGSGANVL  | TRBV18   | TRBJ2-6 |     | 4%  |
| AG                               | PRMEYGNKL     | TRAV21     | TRAJ47 | SPRDLPGEQ      | TRBV18   | TRBJ2-7 |     | 4%  |
| AH                               | RDIGGDM       | TRAV3      | TRAJ43 | SFGGADTQ       | TRBV7-3  | TRBJ2-3 |     | 4%  |

|                   |             |              |        |               |         |         |    |
|-------------------|-------------|--------------|--------|---------------|---------|---------|----|
| AI                | RDPPKAAGNKL | TRAV1-1      | TRAJ17 | SLGAGDEKL     | TRBV19  | TRBJ1-4 | 4% |
| AJ                | RMNRDDKI    | TRAV1-2      | TRAJ30 | SQRADNTDTQ    | TRBV4-2 | TRBJ2-3 | 4% |
| AK                | RSSYNTDKL   | TRAV1-2      | TRAJ34 | SHRADNTDTQ    | TRBV4-2 | TRBJ2-3 | 4% |
| AL                | SDRSLRDDKI  | TRAV3        | TRAJ30 | SLGQGGTPL     | TRBV7-6 | TRBJ1-6 | 4% |
| AM                | SEANQAGTAL  | TRAV8-6      | TRAJ15 | NRRQGST       | TRBV2   | TRBJ1-1 | 4% |
| AN                | SVLSQDSDKL  | TRAV8-6      | TRAJ34 | SYQGGGAGY     | TRBV27  | TRBJ1-2 | 4% |
| AO                | VRMDSNYQL   | TRAV8-3      | TRAJ33 | TGQGLSYEQ     | TRBV5-5 | TRBJ2-7 | 4% |
| AP                | RSTPGTASKL  | TRAV38-2/DV8 | TRAJ44 | SDSPQDRLNTGEL | TRBV9   | TRBJ2-2 | 4% |
| AQ                | EGGDYKL     | TRAV30       | TRAJ20 | SQRYQGRAGNTI  | TRBV4-3 | TRBJ1-3 | 4% |
| # of CDR3αβ pairs |             |              |        |               |         |         | 21 |
|                   |             |              |        |               |         |         | 27 |

Supplementary Table 6. Details of the donors used in the study.

| Donor code                    | Age | HLA-A                  | HLA-B        | Figure                                                  | Discharged<br>at days after<br>disease onset<br>or death |
|-------------------------------|-----|------------------------|--------------|---------------------------------------------------------|----------------------------------------------------------|
| <b>Healthy donor</b>          |     |                        |              |                                                         |                                                          |
| BP90                          | NA  | 02:01, 24 <sup>+</sup> | 07, 40+      | Fig.3b                                                  | NA                                                       |
| BP39                          | 56  | 02:01, 02:01           | 07:02,44:01  | Fig.3b                                                  | NA                                                       |
| BP9                           | 22  | 02:01,68:01            | 44:02, 51:01 | Fig.3b                                                  | NA                                                       |
| BP16                          | 25  | 02:01, 68:01           | 35:01, 3901  | Fig.3b                                                  | NA                                                       |
| BP17                          | 25  | 02:01,1101             | 3501, 3901   | Fig.3b                                                  | NA                                                       |
| <b>H7N9 survival patients</b> |     |                        |              |                                                         |                                                          |
| a11                           | 75  | 30:01, 11:01           | 13:02, 40:06 | Fig.1b-i, Fig2b, 2d,2f,<br>Fig4a, Fig5a-d, Fig6a-d      | 33                                                       |
| a20                           | 81  | 11:02, 26:01           | 15:18, 15:18 | Fig.1b-i, Fig2b-f, Fig4a,<br>Fig5a-d, Fig6a-d           | 23                                                       |
| a78                           | 74  | 02:07, 24:02           | 46:01,48:01  | Fig.1b-i, Fig2b-f, Fig4a,<br>Fig5a-d, Fig6a-d           | 22                                                       |
| a10                           | 65  | 02:01, 32:01           | 07:02, 40:01 | Fig.1b-i, Fig2b-f, Fig3a,3c,                            | 18                                                       |
| a9                            | 67  | 02:01, 02:07,          | 15:11, 40:02 | Fig.1b-i, Fig2b-f, Fig3a,3c,<br>Fig4b, Fig5a-d, Fig6a-d | 23                                                       |
| a79                           | 78  | 02:01, 11:01           | 15:01, 56:03 | Fig.1a-i, Fig2b-f, Fig3a,3c,<br>Fig4b, Fig5a-d, Fig6a-d | 31                                                       |
| <b>H7N9 fatal patients</b>    |     |                        |              |                                                         |                                                          |
| a131                          | 79  | 03:01, 11:01           | 13:02, 38:02 | Fig.1b-i, Fig2b-f, Fig4c,<br>Fig5a-d, Fig6a-d           | 62                                                       |
| a33                           | 56  | 02:06, 31:01           | 40:06, 56:01 | Fig.1a-i, Fig2b-f, Fig4c,<br>Fig5a-d, Fig6a-d           | 76                                                       |

Molecular resolution of HLA class I antigens (4-digit) are shown where available. NA: Not applicable;

Supplementary Table 7. Frequencies of expanded (blue) and non-expanded (black) CDR3 $\alpha\beta$  clonotypes within CD38<sup>+</sup>HLA-DR<sup>+</sup> CD8<sup>+</sup> T cells in patients a11 and a33 at different time-points after hospital admission, as detected by single-cell RNAseq

| a11 patient  |        |                           |          |         |              | D15 ScRNA seq |    | D29 ScRNA seq |     |
|--------------|--------|---------------------------|----------|---------|--------------|---------------|----|---------------|-----|
| TRAV         | TRAJ   | CDR3 $\alpha$             | TRBV     | TRBJ    | CDR3 $\beta$ | #             | %  | #             | %   |
| TRAV14/DV4   | TRAJ31 | TVGNARL                   | TRBV7-3  | TRBJ2-5 | SPDPGETQ     | 2             | 9% |               |     |
| TRAV14/DV4   | TRAJ52 | REGLDGTSGYGL              | TRBV5-6  | TRBJ1-2 | TPAGSLYGY    | 2             | 9% | 4             | 22% |
| TRAV16       | TRAJ18 | MDRRGSTLGRL               | TRBV11-2 | TRBJ2-2 | SPLGTHPNTGEL |               |    | 3             | 16% |
| TRAV17       | TRAJ42 | PTGRDGGSQGNL              | TRBV11-2 | TRBJ2-2 | SPLGTHPNTGEL |               |    | 3             | 16% |
| TRAV29/DV5   | TRAJ39 | SGSAGNML                  | TRBV5-1  | TRBJ1-3 | SLDFRNTI     |               |    | 2             | 11% |
| TRAV38-2/DV8 | TRAJ4  | FSGGYNKL                  | TRBV4-1  | TRBJ1-1 | SQDRYRMNTEA  |               |    | 2             | 11% |
| TRAV17       | TRAJ22 | GDSGSARQL                 | TRBV4-1  | TRBJ2-3 | SHQPLAGDTQ   | 2             | 9% |               |     |
| TRAV17       | TRAJ45 | DGEYSGGGADGL              | TRBV7-9  | TRBJ1-1 | SLQGWTEA     | 1             | 4% |               |     |
| TRAV17       | TRAJ6  | DDDYKLSFGAGTTVTVRARGSY IP | TRBV19   | TRBJ1-1 | SIGRGNTEA    | 1             | 4% |               |     |
| TRAV17       | TRAJ20 | DDDYKL                    | TRBV19   | TRBJ1-1 | SIGRGNTEA    | 1             | 4% |               |     |
| TRAV24       | TRAJ45 | IDSGGGADGL                | TRBV19   | TRBJ1-1 | SIHRVNTEA    | 1             | 4% |               |     |
| TRAV14/DV4   | TRAJ52 | REGLDGTSGYGL              | TRBV5-6  | TRBJ1-2 | TPAGSLYGY    | 1             | 4% |               |     |
| TRAV27       | TRAJ26 | ADNYGQNF                  | TRBV18   | TRBJ1-2 | SRYGSPLSGY   | 1             | 4% |               |     |
| TRAV40       | TRAJ33 | NYQL                      | TRBV18   | TRBJ1-2 | SRYGSPLSGY   | 1             | 4% |               |     |
| TRAV5        | TRAJ9  | ENTGGFKT                  | TRBV2    | TRBJ1-2 | THRGGGY      | 1             | 4% |               |     |
| TRAV17       | TRAJ9  | DPDNTGGFKT                | TRBV2    | TRBJ1-4 | RETGGNEKL    | 1             | 4% |               |     |
| TRAV3        | TRAJ18 | RDVGGSTLGRL               | TRBV7-9  | TRBJ1-4 | SLGVGEKL     | 1             | 4% |               |     |
| TRAV12-2     | TRAJ4  | ISGGYNKL                  | TRBV11-2 | TRBJ1-5 | SWGQGGNQPPQ  | 1             | 4% |               |     |
| TRAV14/DV4   | TRAJ11 | RASGYSTL                  | TRBV6-5  | TRBJ2-1 | SKFGPGNNEQ   | 1             | 4% |               |     |
| TRAV1-2      | TRAJ23 | RDMIYNQGGKL               | TRBV9    | TRBJ2-2 | SVAEAGEL     | 1             | 4% |               |     |
| TRAV8-6      | TRAJ42 | TIWGSQGNL                 | TRBV2    | TRBJ2-2 | SVSGAGGEL    | 1             | 4% |               |     |
| TRAV29/DV5   | TRAJ4  | KGVSGGYNKL                | TRBV2    | TRBJ2-6 | SPRGFSAGANVL | 1             | 4% |               |     |

|                  |        |              |         |         |                   |    |    |    |    |
|------------------|--------|--------------|---------|---------|-------------------|----|----|----|----|
| TRAV14/DV4       | TRAJ58 | RETSGSRL     | TRBV2   | TRBJ2-7 | SEFFGSGLSSYE<br>Q | 1  | 4% |    |    |
| TRAV8-1          | TRAJ11 | NAGYSTL      | TRBV27  | TRBJ2-7 | SGTGGLSHEQ        | 1  | 4% |    |    |
| TRAV14/DV4       | TRAJ52 | REGLDGTSYGKL | TRBV5-6 | TRBJ1-2 | TPAGSLYGY         |    |    | 1  | 5% |
| TRAV12-2         | TRAJ26 | SGQNF        | TRBV5-5 | TRBJ2-1 | SFDLYNEQ          |    |    | 1  | 5% |
| TRAV19           | TRAJ57 | IPQLGQGGSEKL | TRBV7-9 | TRBJ1-1 | SLVWVGRNTEA       |    |    | 1  | 5% |
| TRAV21           | TRAJ43 | ISDM         | TRBV7-2 | TRBJ1-2 | SLSPSDGY          |    |    | 1  | 5% |
| TRAV19           | TRAJ48 | SEAFGDFGNEKL | TRBV7-9 | TRBJ2-1 | SIWVGTGSQGEQ      |    |    | 1  | 5% |
| TRAV38-<br>2/DV8 | TRAJ13 | YSGGYQKV     | TRBV4-1 | TRBJ2-7 | SQDLYRASYEQ       |    |    | 1  | 5% |
|                  |        |              |         |         |                   | 23 |    | 19 |    |

| a33 patient  |        |                   |          |         |                     | D12 ScRNA seq |     | D31 ScRNA seq |    |
|--------------|--------|-------------------|----------|---------|---------------------|---------------|-----|---------------|----|
| TRAV         | TRAJ   | CDR3 $\alpha$     | TRBV     | TRBJ    | CDR3 $\beta$        | #             | f%  | #             | f% |
| TRAV3        | TRAJ32 | RDFRYGGATNKL      | TRBV5-6  | TRBJ2-7 | SGAGTDFYEQ          | 1             | 3%  | 1             | 4% |
| TRAV13-2     | TRAJ30 | KDDRDDKI          | TRBV6-6  | TRBJ2-3 | SYPEGLAGSTWGDT<br>Q | 3             | 10% | 1             | 4% |
| TRAV14/DV4   | TRAJ53 | REGSRMGGSNYK<br>L | TRBV19   | TRBJ1-1 | SIYENTEA            | 2             | 7%  |               |    |
| TRAV38-2/DV8 | TRAJ47 | EEYGKNL           | TRBV24-1 | TRBJ2-3 | RGVSRGDTDTQ         | 3             | 10% | 1             | 4% |
| TRAV38-2/DV8 | TRAJ40 | GTSPTYKY          | TRBV4-1  | TRBJ2-1 | SQDLYRGLGEQ         | 3             | 10% |               |    |
| TRAV26-1     | TRAJ30 | RDNRRDDKI         | TRBV6-6  | TRBJ2-7 | SYSEKTGDEQ          | 1             | 3%  |               |    |
| TRAV14/DV4   | TRAJ42 | DGGSQGNL          | TRBV4-1  | TRBJ2-1 | SQAPSGSYNEQ         | 1             | 3%  |               |    |
| TRAV21       | TRAJ57 | RLITQGGSEKL       | TRBV14   | TRBJ2-7 | SLYPGYEQ            | 1             | 3%  |               |    |
| TRAV22       | TRAJ42 | PGVYGGSQGNL       | TRBV7-9  | TRBJ1-4 | SLVADEKL            | 1             | 3%  |               |    |
| TRAV25       | TRAJ53 | RLYRVNRKL         | TRBV19   | TRBJ1-1 | SIYENTEA            | 1             | 3%  |               |    |
| TRAV26-1     | TRAJ42 | GLNYGGSQGNL       | TRBV7-7  | TRBJ1-3 | SFGQGAVGGNTI        | 1             | 3%  |               |    |
| TRAV26-2     | TRAJ30 | RDDRDDKI          | TRBV6-6  | TRBJ1-6 | SYNEFSSYNSPL        | 1             | 3%  |               |    |
| TRAV27       | TRAJ13 | DHSGGYQKV         | TRBV28   | TRBJ2-7 | SSPDPTRGHEQ         | 1             | 3%  |               |    |
| TRAV27       | TRAJ40 | ALASPTYKY         | TRBV9    | TRBJ2-3 | SVSVTDTQ            | 1             | 3%  |               |    |
| TRAV27       | TRAJ40 | AAASPTYKY         | TRBV9    | TRBJ2-3 | SISITDTQ            | 1             | 3%  |               |    |
| TRAV27       | TRAJ40 | AAASPTYKY         | TRBV20-1 | TRBJ2-7 | RKFTDRTTYEQ         | 1             | 3%  |               |    |
| TRAV29/DV5   | TRAJ49 | SRGNQF            | TRBV6-6  | TRBJ1-6 | SYNEFSSYNSPL        | 1             | 3%  |               |    |
| TRAV30       | TRAJ43 | NNNDM             | TRBV5-6  | TRBJ1-4 | SYWTGPAATNEKL       | 1             | 3%  |               |    |
| TRAV38-2/DV8 | TRAJ40 | GTSPTYKY          | TRBV4-1  | TRBJ2-1 | SQDLYRGLGEQ         | 1             | 3%  |               |    |
| TRAV8-1      | TRAJ36 | NPDRGANNL         | TRBV7-2  | TRBJ1-4 | SLSSATNEKL          | 1             | 3%  |               |    |
| TRAV8-2      | TRAJ47 | SHPDYGNKL         | TRBV19   | TRBJ2-1 | SIFAGLAAYNEQ        | 1             | 3%  |               |    |
| TRAV8-6      | TRAJ30 | SEPSDDKI          | TRBV7-8  | TRBJ2-7 | SLERVAVYEQ          | 1             | 3%  |               |    |
| TRAV9-2      | TRAJ30 | EGRDDKI           | TRBV5-4  | TRBJ1-2 | SLSGRVEIGY          | 1             | 3%  |               |    |

|            |        |                |          |         |                |    |    |
|------------|--------|----------------|----------|---------|----------------|----|----|
| TRAV14/DV4 | TRAJ30 | RVMEDRDDKI     | TRBV25-1 | TRBJ1-1 | SDATAMGPNTEA   | 1  | 4% |
| TRAV1-2    | TRAJ31 | HDNNARL        | TRBV7-2  | TRBJ2-1 | SPQDLEQ        | 1  | 4% |
| TRAV12-2   | TRAJ28 | TPGSYQL        | TRBV7-8  | TRBJ2-7 | SLRTYEQ        | 1  | 4% |
| TRAV12-3   | TRAJ42 | SALGSQGNL      | TRBV5-4  | TRBJ1-1 | SPGLYTEA       | 1  | 4% |
| TRAV12-3   | TRAJ27 | SDSANAGKS      | TRBV29-1 | TRBJ1-2 | GGPRPGY        | 1  | 4% |
| TRAV12-3   | TRAJ3  | SAYSSASKI      | TRBV7-2  | TRBJ2-1 | SPQDLEQ        | 1  | 4% |
| TRAV13-1   | TRAJ4  | SQHGGYNKL      | TRBV20-1 | TRBJ2-3 | QRRGEITDTQ     |    |    |
| TRAV17     | TRAJ29 | DERNTPL        | TRBV7-9  | TRBJ2-7 | SVGPGTGLYEQ    | 1  | 4% |
| TRAV17     | TRAJ29 | DERNTPL        | TRBV6-4  | TRBJ1-3 | GRGKSEGTVNGNTI | 1  | 4% |
| TRAV2      | TRAJ24 | EGGEKTTDSWGKF  | TRBV7-8  | TRBJ2-7 | SLRTYEQ        | 1  | 4% |
| TRAV21     | TRAJ49 | LTNTGNQF       | TRBV6-2  | TRBJ1-2 | SPGTGFYGY      | 1  | 4% |
| TRAV21     | TRAJ30 | RERDDKI        | TRBV5-4  | TRBJ2-7 | SPDGDLLNEQ     | 1  | 4% |
| TRAV21     | TRAJ47 | AEYGNKL        | TRBV6-5  | TRBJ2-3 | SSGQSTDTQ      | 1  | 4% |
| TRAV22     | TRAJ45 | TGGGADGL       | TRBV11-2 | TRBJ2-7 | SLGTNYEQ       | 1  | 4% |
| TRAV22     | TRAJ21 | ELGFNKF        | TRBV10-3 | TRBJ2-5 | TGGGETQ        | 1  | 4% |
| TRAV25     | TRAJ25 | YVGRKF         | TRBV29-1 | TRBJ2-1 | TQGGTYNEQ      |    |    |
| TRAV25     | TRAJ53 | HSGGSNYKL      | TRBV9    | TRBJ2-7 | SDGGTGVYEQ     | 1  | 4% |
| TRAV26-2   | TRAJ45 | RDPGAYSGGGADGL | TRBV29-1 | TRBJ2-7 | EDYTGGHYEQ     | 1  | 4% |
| TRAV35     | TRAJ41 | RENSGYAL       | TRBV5-1  | TRBJ1-1 | KEGTEA         | 1  | 4% |
| TRAV35     | TRAJ33 | RGDSNYQL       | TRBV10-2 | TRBJ2-1 | RRLTSGGNNEQ    | 1  | 4% |
| TRAV4      | TRAJ20 | GADYKL         | TRBV4-3  | TRBJ2-7 | SHGLAGVSSYEQ   | 1  | 4% |
| TRAV5      | TRAJ17 | KQNKAAGNKL     | TRBV7-9  | TRBJ2-7 | SPQRNYEQ       | 1  | 4% |
| TRAV8-3    | TRAJ56 | GGLAGANSKL     | TRBV5-4  | TRBJ1-1 | SPGLYTEA       | 1  | 4% |
| TRAV8-3    | TRAJ29 | NSGNTPL        | TRBV7-9  | TRBJ2-5 | SIQETQ         | 1  | 4% |
| TRAV8-4    | TRAJ22 | NSGSGSARQL     | TRBV24-1 | TRBJ1-5 | SDWDRDQPQ      | 1  | 4% |
| TRAV8-6    | TRAJ8  | TQSRGFQKL      | TRBV11-2 | TRBJ2-3 | SFGQGTDTQ      | 1  | 4% |
|            |        |                |          |         |                | 30 | 27 |

Abbreviations: ND, not determined; X, different amino acid; #, unproductive due to out-of-frame shift.  
 $\alpha\beta$  CDR3 clonotypes found at >1 during single-cell RNAseq analysis are marked in blue.

Supplementary Table 8. Primers used for the single-cell RT-PCR TCR amplification.

| Primer Name                   | Seq                    | Primer Name                   | Seq                   |
|-------------------------------|------------------------|-------------------------------|-----------------------|
| External primers              |                        | Internal primers              |                       |
| <b>hTRACext<br/>(reverse)</b> | GACCAGCTTGACATCACAG    | <b>hTRACint<br/>(reverse)</b> | TGTTGCTCTTGAAGTCCATAG |
| hTRBV2ext                     | TCGATGATCAATTCTCAGTTG  | hTRBV2int                     | TTCACTCTGAAGATCCGGTC  |
| hTRBV3ext                     | CAAATACCTGGTCACACAG    | hTRBV3int                     | AATCTTCACATCAATTCCCTG |
| hTRBV4ext                     | TCGCTTCTCACCTGAATG     | hTRBV4int                     | CCTGCAGCCAGAAGACTC    |
| hTRBV5-1ext                   | GATTCTCAGGKCKCCAGTTC   | hTRBV5-1int                   | CTTGGAGCTGGRSGACTC    |
| hTRBV5-5ext                   | GTACCAACAGGYCCTGGGT    | hTRBV5-5int                   | TCTGAGCTGAATGTGAACG   |
| hTRBV6-1ext                   | ACTCAGACCCCAAATTCC     | hTRBV6-1int                   | GTGTRCCCAGGATATGAACC  |
| hTRBV6-4ext                   | ACTGGCAAAGGAGAAGTCC    | hTRBV6-4int                   | TGGTTATAGTGTCTCCAGAGC |
| hTRBV7-1ext                   | TRTGATCCAATTTCAGGTCA   | hTRBV7-1int                   | TCYACTCTGAMGWTCCAGCG  |
| hTRBV7-4ext                   | CGSWTCTYTG CAGARAGGC   | hTRBV7-4int                   | TGRMGATYCAGCGCACA     |
| hTRBV9ext                     | GATCACAGCAACTGGACAG    | hTRBV9int                     | GTACCAACAGAGCCTGGAC   |
| hTRBV10ext                    | TGTWCTGGTATCGACAAGACC  | hTRBV10int                    | TCCYCCTCACTCTGGAGTC   |
| hTRBV11ext                    | CGATTTTCTGCAGAGACGC    | hTRBV11int                    | GACTCCACTCTCAAGATCCA  |
| hTRBV12ext                    | ARGTGACAGARATGGGACAA   | hTRBV12int                    | CYACTCTGARGATCCAGCC   |
| hTRBV13ext                    | AGCGATAAAGGAAGCATCC    | hTRBV13int                    | CATTCTGAACTGAACATGAGC |
| hTRBV14ext                    | CCAACAATCGATTCTTAGCTG  | hTRBV14int                    | ATTCTACTCTGAAGGTGCAGC |
| hTRBV15ext                    | AGTGACCCTGAGTTGTTCTC   | hTRBV15int                    | ATAACTTCCAATCCAGGAGG  |
| hTRBV16ext                    | GTCTTTGATGAAACAGGTATGC | hTRBV16int                    | CTGTAGCCTTGAGATCCAGG  |
| hTRBV17ext                    | AGTTGCTGATTTCTTCCAG    | hTRBV17int                    | CACGCTGAAGATCCATCC    |
| hTRBV18ext                    | CATAGATGAGTCAGGAATGCC  | hTRBV18int                    | CGATTTTCTGCTGAATTTCC  |
| hTRBV19ext                    | AGTTGTGAACAGAATTTGAACC | hTRBV19int                    | TTCCTCTCACTGTGACATCG  |
| hTRBV20ext                    | AAGTTTCTCATCAACCATGC   | hTRBV20int                    | ACTCTGACAGTGACCAGTGC  |

|              |                        |              |                         |
|--------------|------------------------|--------------|-------------------------|
| hTRBV23ext   | GCGATTCTCATCTCAATGC    | hTRBV23int   | GCAATCCTGTCCTCAGAAC     |
| hTRBV24ext   | CCTACGGTTGATCTATTACTCC | hTRBV24int   | GATGGATACAGTGTCTCTCGA   |
| hTRBV25ext   | ACTACACCTCATCCACTATTCC | hTRBV25int   | CAGAGAAGGGAGATCTTTCC    |
| hTRBV2728ext | TGGTATCGACAAGACCCAG    | hTRBV2728int | TTCYCCCTGATYCTGGAGTC    |
| hTRBV29ext   | TTCTGGTACCGTCAGCAAC    | hTRBV29int   | TCTGACTGTGAGCAACATGAG   |
| hTRBV30ext   | TCCAGCTGCTCTTCTACTCC   | hTRBV30int   | AGAATCTCTCAGCCTCCAGAC   |
| hTRBCext     | TAGAACTGGACTTGACAGCG   | hTRBCint     | TTCTGATGGCTCAAACACAG    |
| hTRAV1ext    | AACTGCACGTACCAGACATC   | hTRAV1int    | GCACCCACATTTCTKTCTTAC   |
| hTRAV2ext    | GATGTGCACCAAGACTCC     | hTRAV2int    | CACTCTGTGTCCAATGCTTAC   |
| hTRAV3ext    | AAGATCAGGTCAACGTTGC    | hTRAV3int    | ATGCACCTATTCACTCTCTGG   |
| hTRAV4ext    | CTCCATGGACTCATATGAAGG  | hTRAV4int    | ATTATATCACGTGGTACCAACAG |
| hTRAV5ext    | CTTTTCCTGAGTGTCCGAG    | hTRAV5int    | TACACAGACAGCTCCTCCAC    |
| hTRAV6ext    | CACCCTGACCTGCAACTATAC  | hTRAV6int    | TGGTACCGACAAGATCCAG     |
| hTRAV7ext    | AGCTGCACGTACTCTGTGAG   | hTRAV7int    | ACAATTTGCAGTGGTACAGG    |
| hTRAV8-1ext  | CTCACTGGAGTTGGGATG     | hTRAV8-1int  | GTCAACACCTTCAGCTTCTC    |
| hTRAV8-3ext  | CACTGTCTCTGAAGGAGCC    | hTRAV8-3int  | TTTGAGGCTGAATTTAAGAGG   |
| hTRAV8-24ext | GCCACCCTGGTTAAAGG      | hTRAV8-24int | AGAGTGAAACCTCCTTCCAC    |
| hTRAV8-6ext  | GAGCTGAGGTGCAACTACTC   | hTRAV8-6int  | AACCAAGGACTCCAGCTTC     |
| hTRAV8-7ext  | CTCTGGAACTGAAGTGCAAC   | hTRAV8-7int  | GGAGTTCCTTCTCTCTTCTGG   |
| hTRAV9-1ext  | TGGTATGTCCAATATCCTGG   | hTRAV9-1int  | GAAACCACTTCTTTCCACTTG   |
| hTRAV10ext   | CAAGTGGAGCAGAGTCCTC    | hTRAV10int   | GAAAGAACTGCACTCTTCAATG  |
| hTRAV12-1ext | CARTGTTCCAGAGGGAGC     | hTRAV12-1int | AAGATGGAAGGTTTACAGCAC   |
| hTRAV13-1ext | CATCCTTCAACCCTGAGTG    | hTRAV13-1int | TCAGACAGTGCCTCAAACACTAC |
| hTRAV13-2ext | CAGCGCCTCAGACTACTTC    | hTRAV13-2int | CAGTGAAACATCTCTCTCTGC   |
| hTRAV14ext   | AAGATAACTCAAACCCAACAG  | hTRAV14int   | AGGCTGTGACTCTGGACTG     |
| hTRAV16ext   | AGTGGAGCTGAAGTGCAAC    | hTRAV16int   | GTCCAGTACTCCAGACAACG    |
| hTRAV17ext   | GGAGAAGAGGATCCTCAGG    | hTRAV17int   | CCACCATGAACTGCAGTTAC    |
| hTRAV18ext   | AGAAAACCAGGAGACGGAC    | hTRAV18int   | CAGGCCAGTCCTATCAAGAG    |

|              |                        |              |                       |
|--------------|------------------------|--------------|-----------------------|
| hTRAV19ext   | AGGTAACCTCAAGCGCAGAC   | hTRAV19int   | TGTGACCTTGGACTGTGTG   |
| hTRAV20ext   | CACAGTCAGCGGTTTAAGAG   | hTRAV20int   | TCTGGTATAGGCAAGATCCTG |
| hTRAV21ext   | TTCCTGCAGCTCTGAGTG     | hTRAV21int   | AACTTGGTTCTCAACTGCAG  |
| hTRAV22ext   | GTCCTCCAGACCTGATTCTC   | hTRAV22int   | CTGACTCTGTGAACAATTTGC |
| hTRAV23ext   | TGCTTATGAGAACACTGCG    | hTRAV23int   | TGCATTATTGATAGCCATACG |
| hTRAV24ext   | CTCAGTCACTGCATGTTGAG   | hTRAV24int   | TGCCTTACACTGGTACAGATG |
| hTRAV25ext   | GGACTTCACCACGTACTGC    | hTRAV25int   | TATAAGCAAAGGCCTGGTG   |
| hTRAV26-1ext | GCAAACCTGCCTTGTAATC    | hTRAV26-1int | CGACAGATTCACTCCCAG    |
| hTRAV26-2ext | AGCCAAATTCAATGGAGAG    | hTRAV26-2int | TTCACTTGCCTTGTAACCAC  |
| hTRAV27ext   | TCAGTTTCTAAGCATCCAAGAG | hTRAV27int   | CTCACTGTGTACTGCAACTCC |
| hTRAV29ext   | GCAAGTTAAGCAAAATTCACC  | hTRAV29int   | CTGCTGAAGGTCCTACATTC  |
| hTRAV30ext   | CAACAACCAGTGCAGAGTC    | hTRAV30int   | AGAAGCATGGTGAAGCAC    |
| hTRAV34ext   | AGAAGTGGAGCAGAGTCCTC   | hTRAV34int   | ATCTCACCATAAACTGCACG  |
| hTRAV35ext   | GGTCAACAGCTGAATCAGAG   | hTRAV35int   | ACCTGGCTATGGTACAAGC   |
| hTRAV36ext   | GAAGACAAGGTGGTACAAAGC  | hTRAV36int   | ATCTCTGGTTGTCCACGAG   |
| hTRAV38ext   | GCACATATGACACCAGTGAG   | hTRAV38int   | CAGCAGGCAGATGATTCTC   |
| hTRAV39ext   | CTGTTCTGAGCATGCAG      | hTRAV39int   | TCAACCACTTCAGACAGACTG |
| hTRAV40ext   | GCATCTGTGACTATGAACTGC  | hTRAV40int   | GGAGGCGGAAATATTAAAGAC |
| hTRAV41ext   | AATGAAGTGGAGCAGAGTCC   | hTRAV41int   | TTGTTTATGCTGAGCTCAGG  |

---
